# Supplementary material for: Leaving the multinational: The likelihood and nature of employee mobility from MNEs
Source: Springer Nature journal article supplement (doi:10.1057/s41267-021-00490-7), 2022-01-17
Supplement: 41267_2021_490_MOESM1_ESM.pdf [file 41267_2021_490_MOESM1_ESM.pdf]

# Leaving the Multinational

## The Likelihood and Nature of Employee Mobility from MNEs

Martin Andersson, Davide Castellani, Claudio Fassio, Viroj Jienwatcharamongkhon

## Appendix

**Figure A.1.** A typology of workers' mobility

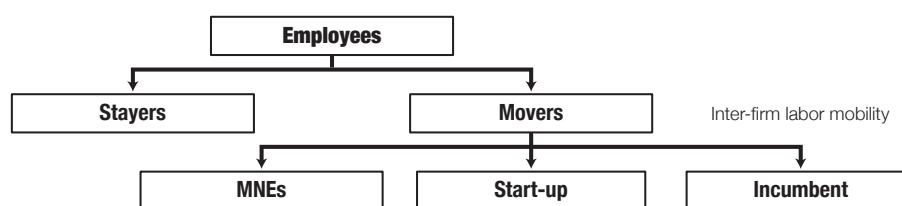

**Table A.1.** List of variables

| Variables                                                  | Description                                                                                                                                                                                 | Source |
|------------------------------------------------------------|---------------------------------------------------------------------------------------------------------------------------------------------------------------------------------------------|--------|
| <b>DEPENDENT VARIABLES</b>                                 |                                                                                                                                                                                             |        |
| <i>Mobility</i>                                            | =1 if, between t and t+1, an employee moves to a different firm; =0 if they do not change employer                                                                                          | FAD    |
| <i>Mobility to other MNEs</i>                              | =1 if, between t and t+1, an employee moves to an MNE; =0 if they do not change employer                                                                                                    | FAD    |
| <i>Mobility to incumbent</i>                               | =1 if, between t and t+1, an employee moves to an existing firm which is not an MNE; =0 if they do not change employer                                                                      | FAD    |
| <i>Mobility to start-up</i>                                | =1 if, between t and t+1, an employee moves to a firm that is founded between t and t+1 or becomes owner of a business that is founded between t and t+1; =0 if they do not change employer | FAD    |
| <b>INDEPENDENT VARIABLES</b>                               |                                                                                                                                                                                             |        |
| <b>INDIVIDUAL-LEVEL</b>                                    |                                                                                                                                                                                             |        |
| <i>Characteristics that do not depend on the workplace</i> |                                                                                                                                                                                             |        |
| <i>Gender</i>                                              | =0 if male and =1 if female                                                                                                                                                                 | LISA   |
| <i>Age</i>                                                 | Age of the individual at current year                                                                                                                                                       | LISA   |
| <i>Children</i>                                            | =1 if the individual has any children                                                                                                                                                       | LISA   |
| <i>Education</i>                                           | Years of education                                                                                                                                                                          | LISA   |
| <i>Phd</i>                                                 | =1 if the individual holds a PhD                                                                                                                                                            | LISA   |
| <i>STEM</i>                                                | =1 if the individual has education within Science, Technology, Engineering, and Mathematics (STEM)                                                                                          | LISA   |
| <i>Social Science</i>                                      | =1 if the individual has education within Social Science field                                                                                                                              | LISA   |
| <i>Prior moves</i>                                         | Number of employer changes in the five years prior to time t                                                                                                                                | LISA   |
| <i>Grades</i>                                              | Registered highschool grades                                                                                                                                                                | LISA   |
| <i>Characteristics that depend on the workplace</i>        |                                                                                                                                                                                             |        |
| <i>Tenure</i>                                              | How many years the individual has worked in the same firm                                                                                                                                   | FAD    |
| <i>Wage</i>                                                | Log of salary income                                                                                                                                                                        | LISA   |
| <i>Manager</i>                                             | =1 if the individual holds a managerial position (Group 1 according to ISCO-88 classification)                                                                                              | LISA   |
| <i>Professional</i>                                        | =1 if the individual has an occupation within the professional field, e.g. physicist, chemist, etc. (Group 2 according to ISCO-88)                                                          | LISA   |
| <i>Technician</i>                                          | Dummy whether the individual is a technician (Group 3 according to ISCO-88)                                                                                                                 | LISA   |

| <b>Variables</b>                 | <b>Description</b>                                                                                                                                                                                                                                                                                                       | <b>Source</b>                  |
|----------------------------------|--------------------------------------------------------------------------------------------------------------------------------------------------------------------------------------------------------------------------------------------------------------------------------------------------------------------------|--------------------------------|
| <b>FIRM-LEVEL</b>                |                                                                                                                                                                                                                                                                                                                          |                                |
| <i>MNE</i>                       | =1 if the firm belongs to an MNE                                                                                                                                                                                                                                                                                         | Register of company group      |
| <i>MNE tenure</i>                | A set of dummy variables indicating whether the firm has a <i>Short-</i> (1-3 years), <i>Medium-</i> (4-9 years) tenure of belonging to a corporate group. <i>Long_MNEtenure</i> (10+ years) is the reference group                                                                                                      |                                |
| <i>Firm Employees</i>            | Number of employees at the firm in which the individual is employed at current year, in logarithmic form                                                                                                                                                                                                                 | FAD                            |
| <i>Group Employees</i>           | Number of employees within the Corporate Group, in logarithmic form, and 0 for firms that do not belong to any corporate group                                                                                                                                                                                           | FAD, Register of company group |
| <i>Value Added</i>               | Total value-added of the firm in which the individual is employed, in logarithmic form                                                                                                                                                                                                                                   |                                |
| <i>Share of R&amp;D managers</i> | Percentage of R&D managers at the firm                                                                                                                                                                                                                                                                                   | LISA, FAD                      |
| <i>Share of STEM</i>             | Percentage of employees at the firm with STEM education and a long tertiary education                                                                                                                                                                                                                                    |                                |
| <i>Share of PhD</i>              | Percentage of employees at the firm with a PhD                                                                                                                                                                                                                                                                           |                                |
| <i>Exporter</i>                  | =1 if the firm is an exporter in year t                                                                                                                                                                                                                                                                                  | UHV                            |
| <i>Importer</i>                  | =1 if the firm is an importer in year t                                                                                                                                                                                                                                                                                  |                                |
| <i>Sales</i>                     | Log of total sales of the firm in year t                                                                                                                                                                                                                                                                                 | FEK                            |
| <i>Exit</i>                      | =1 if the firm exits the market between time <i>t</i> and <i>t+1</i>                                                                                                                                                                                                                                                     | FEK                            |
| <i>Industry</i>                  | A set of dummies indicating the industry of the firm according to OECD definition, i.e. <i>High-</i> , <i>Medium-High-</i> , <i>Medium-Low-</i> , <i>Lowtech</i> manufacturing, <i>Knowledge-</i> and <i>Non-knowledge intensive services</i> ( <i>KIS</i> , <i>LKIS</i> ), and residual sectors are the reference group |                                |
| <b>REGION-LEVEL</b>              |                                                                                                                                                                                                                                                                                                                          |                                |
| <i>Region size</i>               | Log of size of the local labor market region, expressed in total number of employees, in which the individual is employed, excluding the number of employees at the same firm                                                                                                                                            | FEK, FAD                       |

*Note:* The regressions also include year dummies.

**Table A.2.** Descriptive statistics, all sample.

| <b>Variable</b>                  | <b>Observations</b> | <b>Mean</b> | <b>Std. Dev.</b> | <b>Min</b> | <b>Max</b> |
|----------------------------------|---------------------|-------------|------------------|------------|------------|
| <i>Mobility</i>                  | 4,004,227           | 0.062       | 0.242            | 0          | 1          |
| <i>MNE</i>                       | 4,004,227           | 0.682       | 0.466            | 0          | 1          |
| <i>Gender</i>                    | 4,004,227           | 0.337       | 0.473            | 0          | 1          |
| <i>Age</i>                       | 4,004,227           | 42.953      | 9.437            | 25         | 60         |
| <i>Children</i>                  | 4,004,227           | 0.471       | 0.499            | 0          | 1          |
| <i>Education</i>                 | 4,004,227           | 12.244      | 2.274            | 0          | 20         |
| <i>PhD</i>                       | 4,004,227           | 0.008       | 0.088            | 0          | 1          |
| <i>STEM</i>                      | 4,004,227           | 0.415       | 0.493            | 0          | 1          |
| <i>Social Science</i>            | 4,004,227           | 0.300       | 0.458            | 0          | 1          |
| <i>Tenure</i>                    | 4,004,227           | 8.566       | 4.559            | 3          | 18         |
| <i>Wage (tkr)</i>                | 4,004,227           | 4,103       | 2,635            | 1,000      | 374,440    |
| <i>Manager</i>                   | 4,004,227           | 0.079       | 0.270            | 0          | 1          |
| <i>Professional</i>              | 4,004,227           | 0.160       | 0.366            | 0          | 1          |
| <i>Technician</i>                | 4,004,227           | 0.213       | 0.409            | 0          | 1          |
| <i>Prior moves</i>               | 4,004,227           | 0.448       | 0.676            | 0          | 5          |
| <i>Grade</i>                     | 2,742,219           | 13.302      | 3.158            | 0          | 20         |
| <i>Firm Employees</i>            | 4,004,227           | 1,809       | 3,449            | 10         | 17,682     |
| <i>Group Employees</i>           | 4,004,227           | 3,440       | 5,575            | 0          | 48,687     |
| <i>Value added (billion SEK)</i> | 3,625,993           | 1.72        | 4.75             | 0          | 37.4       |
| <i>Share of R&amp;D managers</i> | 4,004,227           | 0.002       | 0.008            | 0          | 0.55       |
| <i>Share of STEM</i>             | 4,004,227           | 0.406       | 0.250            | 0          | 1          |
| <i>Share of PhD</i>              | 4,004,227           | 0.008       | 0.027            | 0          | 0.909      |
| <i>Exporter</i>                  | 4,004,227           | 0.650       | 0.477            | 0          | 1          |
| <i>Importer</i>                  | 4,004,227           | 0.965       | 0.184            | 0          | 1          |
| <i>Sales (billion SEK)</i>       | 3,625,993           | 7.53        | 21.3             | 3          | 121.0      |
| <i>Exit</i>                      | 4,004,227           | 0.028       | 0.164            | 0          | 1          |
| <i>Hightech</i>                  | 4,004,227           | 0.037       | 0.188            | 0          | 1          |
| <i>Medhigh</i>                   | 4,004,227           | 0.140       | 0.347            | 0          | 1          |
| <i>Medlow</i>                    | 4,004,227           | 0.090       | 0.286            | 0          | 1          |
| <i>Lowtech</i>                   | 4,004,227           | 0.089       | 0.285            | 0          | 1          |
| <i>KIS</i>                       | 4,004,227           | 0.195       | 0.396            | 0          | 1          |
| <i>LKIS</i>                      | 4,004,227           | 0.295       | 0.456            | 0          | 1          |
| <i>Region Size</i>               | 4,004,227           | 545,421     | 521,609          | 1,114      | 1,336,675  |

**Table A.3. Descriptive statistics: MNE versus non-MNE workers.**

| Variable                         | Non-MNE   |         |           | MNE       |         |           | t-statistic |
|----------------------------------|-----------|---------|-----------|-----------|---------|-----------|-------------|
|                                  | Obs       | Mean    | Std. Dev. | Obs       | Mean    | Std. Dev. |             |
| <i>Mobility</i>                  | 1,263,647 | 0.075   | 0.263     | 2,623,654 | 0.056   | 0.230     | 71.69       |
| <i>Gender</i>                    | 1,263,647 | 0.338   | 0.473     | 2,623,654 | 0.333   | 0.471     | 10.25       |
| <i>Age</i>                       | 1,263,647 | 42.269  | 9.733     | 2,623,654 | 43.315  | 9.286     | -100.00     |
| <i>Children</i>                  | 1,263,647 | 0.460   | 0.498     | 2,623,654 | 0.474   | 0.499     | -24.87      |
| <i>Education</i>                 | 1,263,647 | 11.838  | 2.144     | 2,623,654 | 12.410  | 2.300     | -230.00     |
| <i>PhD</i>                       | 1,263,647 | 0.003   | 0.051     | 2,623,654 | 0.010   | 0.100     | -79.01      |
| <i>STEM</i>                      | 1,263,647 | 0.359   | 0.480     | 2,623,654 | 0.442   | 0.497     | -160.00     |
| <i>Social Science</i>            | 1,263,647 | 0.310   | 0.462     | 2,623,654 | 0.293   | 0.455     | 34.50       |
| <i>Tenure</i>                    | 1,263,647 | 7.996   | 4.395     | 2,623,654 | 8.855   | 4.615     | -170.00     |
| <i>Wage</i>                      | 1,263,647 | 3,578   | 1,776     | 2,623,654 | 4,330   | 2,796     | -280.00     |
| <i>Manager</i>                   | 1,263,647 | 0.061   | 0.240     | 2,623,654 | 0.086   | 0.281     | -86.08      |
| <i>Professional</i>              | 1,263,647 | 0.109   | 0.312     | 2,623,654 | 0.179   | 0.383     | -180.00     |
| <i>Technician</i>                | 1,263,647 | 0.159   | 0.366     | 2,623,654 | 0.239   | 0.427     | -180.00     |
| <i>Prior moves</i>               | 1,263,647 | 0.505   | 0.708     | 2,623,654 | 0.418   | 0.658     | 117.96      |
| <i>Grade</i>                     | 826,082   | 12.967  | 3.181     | 1,829,128 | 13.427  | 3.139     | -110.00     |
| <i>FirmEmployees</i>             | 1,263,647 | 199     | 708       | 2,623,654 | 2,599   | 3,986     | -670.00     |
| <i>GroupEmployees</i>            | 1,263,647 | 24      | 329       | 2,623,654 | 4,921   | 6,114     | -900.00     |
| <i>Valueadded (bill SEK)</i>     | 1,200,933 | 0.121   | 0.508     | 2,425,060 | 2.51    | 5.63      | -460.00     |
| <i>Share of R&amp;D managers</i> | 1,263,647 | 0.000   | 0.005     | 2,623,654 | 0.003   | 0.009     | -330.00     |
| <i>Share of STEM</i>             | 1,263,647 | 0.349   | 0.263     | 2,623,654 | 0.433   | 0.238     | -320.00     |
| <i>Share of PhD</i>              | 1,263,647 | 0.003   | 0.021     | 2,623,654 | 0.011   | 0.027     | -280.00     |
| <i>Exporter</i>                  | 1,263,647 | 0.293   | 0.455     | 2,623,654 | 0.816   | 0.387     | -1,200.00   |
| <i>Importer</i>                  | 1,263,647 | 0.934   | 0.249     | 2,623,654 | 0.980   | 0.140     | -230.00     |
| <i>Sales (billion SEK)</i>       | 1,200,933 | 0.344   | 1.540     | 2,425,060 | 11.10   | 25.30     | -470.00     |
| <i>Exit</i>                      | 1,263,647 | 0.037   | 0.189     | 2,623,654 | 0.022   | 0.145     | 89.27       |
| <i>Hightech</i>                  | 1,263,647 | 0.005   | 0.067     | 2,623,654 | 0.053   | 0.225     | -240.00     |
| <i>Medhigh</i>                   | 1,263,647 | 0.036   | 0.185     | 2,623,654 | 0.191   | 0.393     | -420.00     |
| <i>Medlow</i>                    | 1,263,647 | 0.080   | 0.272     | 2,623,654 | 0.092   | 0.289     | -36.90      |
| <i>Lowtech</i>                   | 1,263,647 | 0.073   | 0.260     | 2,623,654 | 0.100   | 0.300     | -87.78      |
| <i>KIS</i>                       | 1,263,647 | 0.215   | 0.411     | 2,623,654 | 0.184   | 0.388     | 71.55       |
| <i>LKIS</i>                      | 1,263,647 | 0.377   | 0.485     | 2,623,654 | 0.250   | 0.433     | 259.80      |
| <i>RegionSize</i>                | 1,263,647 | 509,893 | 518,105   | 2,623,654 | 558,605 | 522,866   | -86.29      |

**Table A.4.** Probability to leave the current firm (only individuals with tenure longer than 2 years at the same firm) – Logit estimation

| VARIABLES                         | (3)               |      |         | (4)        |      |         |
|-----------------------------------|-------------------|------|---------|------------|------|---------|
|                                   | Tertiary Educated |      |         | STEM       |      |         |
|                                   | Odds ratio        | se   | p-value | Odds ratio | se   | p-value |
| <i>MNE</i>                        | 1.50              | 0.03 | 0.00    | 1.36       | 0.03 | 0.00    |
| <b>Individual-level variables</b> |                   |      |         |            |      |         |
| <i>Gender</i>                     | 1.02              | 0.01 | 0.02    | 0.99       | 0.01 | 0.26    |
| <i>Age</i>                        | 0.97              | 0.00 | 0.00    | 0.97       | 0.00 | 0.00    |
| <i>Children</i>                   | 1.04              | 0.01 | 0.00    | 1.10       | 0.01 | 0.00    |
| <i>Education</i>                  | 1.04              | 0.01 | 0.00    | 1.04       | 0.00 | 0.00    |
| <i>PhD</i>                        | 0.93              | 0.03 | 0.02    | 0.90       | 0.03 | 0.00    |
| <i>STEM</i>                       | 1.13              | 0.02 | 0.00    | -          | -    | -       |
| <i>Social Science</i>             | 1.21              | 0.02 | 0.00    | -          | -    | -       |
| <i>Tenure</i>                     | 0.94              | 0.00 | 0.00    | 0.94       | 0.00 | 0.00    |
| <i>lnWage</i>                     | 0.98              | 0.01 | 0.13    | 1.10       | 0.01 | 0.00    |
| <i>Manager</i>                    | 1.32              | 0.02 | 0.00    | 1.39       | 0.02 | 0.00    |
| <i>Professional</i>               | 1.29              | 0.02 | 0.00    | 1.50       | 0.02 | 0.00    |
| <i>Technician</i>                 | 1.22              | 0.02 | 0.00    | 1.41       | 0.02 | 0.00    |
| <i>Prior moves</i>                | 1.07              | 0.01 | 0.00    | 1.11       | 0.01 | 0.00    |
| <b>Firm-level variables</b>       |                   |      |         |            |      |         |
| <i>lnFirmEmployees</i>            | 1.17              | 0.01 | 0.00    | 1.26       | 0.01 | 0.00    |
| <i>lnGroupEmployees</i>           | 0.95              | 0.00 | 0.00    | 0.95       | 0.00 | 0.00    |
| <i>lnValueadd</i>                 | 0.91              | 0.01 | 0.00    | 0.82       | 0.01 | 0.00    |
| <i>Share of R&amp;D Manager</i>   | 0.46              | 0.18 | 0.05    | 1.17       | 0.46 | 0.69    |
| <i>Share of STEM</i>              | 1.01              | 0.03 | 0.77    | 0.87       | 0.03 | 0.00    |
| <i>Share of PhD</i>               | 0.62              | 0.07 | 0.00    | 0.58       | 0.07 | 0.00    |
| <i>Exporter</i>                   | 0.94              | 0.01 | 0.00    | 0.95       | 0.01 | 0.00    |
| <i>Importer</i>                   | 0.86              | 0.02 | 0.00    | 0.89       | 0.02 | 0.00    |
| <i>lnSales</i>                    | 0.95              | 0.01 | 0.00    | 0.97       | 0.01 | 0.00    |
| <i>Exit</i>                       | 3.50              | 0.05 | 0.00    | 5.20       | 0.07 | 0.00    |
| <i>lnRegion Size</i>              | 1.08              | 0.00 | 0.00    | 1.05       | 0.00 | 0.00    |
| <i>Y2010</i>                      | 1.07              | 0.01 | 0.00    | 1.10       | 0.01 | 0.00    |
| <i>Y2011</i>                      | 0.98              | 0.01 | 0.07    | 0.96       | 0.01 | 0.00    |
| <i>Y2012</i>                      | 0.89              | 0.01 | 0.00    | 0.88       | 0.01 | 0.00    |
| <i>Y2013</i>                      | 0.95              | 0.01 | 0.00    | 0.95       | 0.01 | 0.00    |
| 3-digit industry dummies          | YES               | YES  | YES     | YES        | YES  | YES     |
| Constant                          | 0.42              | 0.12 | 0.00    | 1.17       | 0.31 | 0.55    |

|                             |          |           |
|-----------------------------|----------|-----------|
| Observations                | 901,138  | 1,561,656 |
| McFadden's Pseudo R-squared | 0.06     | 0.09      |
| Log-likelihood              | -262,087 | -324,609  |
| Chi-squared                 | 34,092   | 64,463    |

---

*Note:* All regressions include 3-digit industry dummies.

**Table A.5. Probability to move from Swedish vs. Foreign MNEs (only individuals with longer than 2 years tenure at the same firm)**

| VARIABLES                   | (1)         |      |         | (2)               |      |         | (3)        |      |         |
|-----------------------------|-------------|------|---------|-------------------|------|---------|------------|------|---------|
|                             | All workers |      |         | Tertiary Educated |      |         | STEM       |      |         |
|                             | Odds ratio  | se   | p-value | Odds ratio        | se   | p-value | Odds ratio | se   | p-value |
| Swedish MNE                 | 1.27        | 0.02 | 0.00    | 1.35              | 0.03 | 0.00    | 1.22       | 0.03 | 0.00    |
| Foreign MNE                 | 1.45        | 0.02 | 0.00    | 1.55              | 0.03 | 0.00    | 1.40       | 0.03 | 0.00    |
| Observations                | 3,625,916   |      |         | 901,138           |      |         | 1,561,656  |      |         |
| McFadden's Pseudo R-squared | 0.09        |      |         | 0.06              |      |         | 0.09       |      |         |
| Log-likelihood              | -772,015    |      |         | -261,998          |      |         | -324,511   |      |         |
| Chi-squared                 | 151,999     |      |         | 34,242            |      |         | 64,668     |      |         |

Note: Each estimation includes the same set of controls as in column (2) of Table 1



**Table A.6.** Probability to move distinguishing by firms with different MNE tenure (only individuals with longer than 2 years tenure at the same firm)

| VARIABLES                   | (1)         |      |         | (2)               |      |         | (3)        |      |         |
|-----------------------------|-------------|------|---------|-------------------|------|---------|------------|------|---------|
|                             | All workers |      |         | Tertiary Educated |      |         | STEM       |      |         |
|                             | Odds ratio  | se   | p-value | Odds ratio        | se   | p-value | Odds ratio | se   | p-value |
| Short MNE affiliation       | 1.34        | 0.02 | 0.00    | 1.43              | 0.04 | 0.00    | 1.28       | 0.03 | 0.00    |
| Medium MNE affiliation      | 1.31        | 0.02 | 0.00    | 1.47              | 0.03 | 0.00    | 1.31       | 0.03 | 0.00    |
| Long MNE affiliation        | 1.50        | 0.02 | 0.00    | 1.57              | 0.03 | 0.00    | 1.43       | 0.03 | 0.00    |
| Observations                | 3,625,916   |      |         | 901,138           |      |         | 1,561,656  |      |         |
| McFadden's Pseudo R-squared | 0.09        |      |         | 0.06              |      |         | 0.09       |      |         |
| Log-likelihood              | -772,073    |      |         | -262,068          |      |         | -324,577   |      |         |
| Chi-squared                 | 151,901     |      |         | 34,101            |      |         | 64,485     |      |         |

Note: *ShortMNEaffiliation* 1-3 years; *MediumMNEaffiliation* 4-9 years; *LongMNEaffiliation* 10+ years. Each estimation includes the same set of controls as in column (2) of Table 1.

**Table A.7.** Probability to move controlling for wage growth (only individuals with longer than 2 years tenure at the same firm)

| VARIABLES      | (1)         |      |         | (2)        |      |         | (3)        |      |         |
|----------------|-------------|------|---------|------------|------|---------|------------|------|---------|
|                | All workers |      |         | Tertiary   |      |         | STEM       |      |         |
|                | Odds ratio  | se   | p-value | Odds ratio | se   | p-value | Odds ratio | se   | p-value |
| MNE            | 1.38        | 0.02 | 0.00    | 1.50       | 0.03 | 0.00    | 1.32       | 0.03 | 0.00    |
| lnWage         | 1.94        | 0.02 | 0.00    | 1.93       | 0.03 | 0.00    | 2.27       | 0.04 | 0.00    |
| Wage growth    | 7.48        | 0.15 | 0.00    | 6.62       | 0.17 | 0.00    | 12.52      | 0.40 | 0.00    |
| Observations   | 3,355,631   |      |         | 832,218    |      |         | 1,471,310  |      |         |
| Pseudo R2      | 0.112       |      |         | 0.0972     |      |         | 0.119      |      |         |
| Log-likelihood | -610962     |      |         | -202567    |      |         | -266869    |      |         |
| Chi-squared    | 142493      |      |         | 37910      |      |         | 64910      |      |         |

Note: each estimation includes the same set of controls as in column (2) of Table 1.

**Table A.8:** *Estimates of the interacted MNE-effect (workers in the private sector with tenure longer than 2 years)*

| VARIABLES                          | (1)         |      |         | (2)               |      |         | (3)        |      |         |
|------------------------------------|-------------|------|---------|-------------------|------|---------|------------|------|---------|
|                                    | All workers |      |         | Tertiary Educated |      |         | STEM       |      |         |
|                                    | Odds ratio  | se   | p-value | Odds ratio        | se   | p-value | Odds ratio | se   | p-value |
| <b>Level variables: Individual</b> |             |      |         |                   |      |         |            |      |         |
| <i>MNE</i>                         | 1.34        | 0.23 | 0.09    | 3.88              | 1.20 | 0.00    | 2.99       | 0.88 | 0.00    |
| <i>Gender</i>                      | 0.88        | 0.01 | 0.00    | 1.01              | 0.02 | 0.63    | 0.97       | 0.02 | 0.16    |
| <i>Children</i>                    | 1.06        | 0.01 | 0.00    | 0.99              | 0.01 | 0.31    | 1.09       | 0.01 | 0.00    |
| <i>PhD</i>                         | 0.99        | 0.07 | 0.86    | 1.09              | 0.08 | 0.27    | 1.06       | 0.10 | 0.54    |
| <i>STEM</i>                        | 1.04        | 0.01 | 0.00    | 1.18              | 0.04 | 0.00    | -          | -    | -       |
| <i>Social Science</i>              | 1.02        | 0.01 | 0.05    | 1.18              | 0.04 | 0.00    | -          | -    | -       |
| <i>Manager</i>                     | 1.07        | 0.02 | 0.00    | 1.22              | 0.04 | 0.00    | 1.07       | 0.03 | 0.02    |
| <i>Professional</i>                | 1.32        | 0.02 | 0.00    | 1.27              | 0.03 | 0.00    | 1.39       | 0.04 | 0.00    |
| <i>Technician</i>                  | 1.25        | 0.01 | 0.00    | 1.17              | 0.03 | 0.00    | 1.28       | 0.02 | 0.00    |
| <i>Age</i>                         | 0.97        | 0.00 | 0.00    | 0.97              | 0.00 | 0.00    | 0.98       | 0.00 | 0.00    |
| <i>Education</i>                   | 1.05        | 0.00 | 0.00    | 1.04              | 0.01 | 0.00    | 1.04       | 0.01 | 0.00    |
| <i>Tenure</i>                      | 0.95        | 0.00 | 0.00    | 0.94              | 0.00 | 0.00    | 0.94       | 0.00 | 0.00    |
| <i>lnWage</i>                      | 0.93        | 0.01 | 0.00    | 0.81              | 0.02 | 0.00    | 0.98       | 0.03 | 0.52    |
| <i>Prior moves</i>                 | 1.17        | 0.01 | 0.00    | 1.08              | 0.01 | 0.00    | 1.16       | 0.01 | 0.00    |
| <b>Interactions: Individual</b>    |             |      |         |                   |      |         |            |      |         |
| <i>MNE × Gender (female)</i>       | 1.12        | 0.01 | 0.00    | 1.02              | 0.02 | 0.37    | 1.02       | 0.03 | 0.34    |
| <i>MNE × Children</i>              | 1.04        | 0.01 | 0.00    | 1.08              | 0.02 | 0.00    | 1.02       | 0.02 | 0.30    |
| <i>MNE × PhD</i>                   | 0.84        | 0.06 | 0.02    | 0.83              | 0.07 | 0.03    | 0.84       | 0.08 | 0.08    |
| <i>MNE × STEM</i>                  | 1.01        | 0.01 | 0.46    | 0.95              | 0.04 | 0.29    | -          | -    | -       |
| <i>MNE × Social Science</i>        | 1.06        | 0.01 | 0.00    | 1.04              | 0.04 | 0.34    | -          | -    | -       |
| <i>MNE × Manager</i>               | 1.37        | 0.03 | 0.00    | 1.11              | 0.04 | 0.01    | 1.46       | 0.05 | 0.00    |
| <i>MNE × Professional</i>          | 1.11        | 0.02 | 0.00    | 1.04              | 0.03 | 0.11    | 1.16       | 0.03 | 0.00    |
| <i>MNE × Technician</i>            | 1.14        | 0.02 | 0.00    | 1.06              | 0.03 | 0.03    | 1.19       | 0.03 | 0.00    |

|                                              |      |      |      |      |      |      |      |      |      |
|----------------------------------------------|------|------|------|------|------|------|------|------|------|
| <i>MNE × Age (avg)</i>                       | 0.99 | 0.00 | 0.00 | 0.99 | 0.00 | 0.00 | 0.99 | 0.00 | 0.00 |
| <i>MNE × Education (avg)</i>                 | 1.00 | 0.00 | 0.57 | 1.00 | 0.01 | 0.82 | 1.00 | 0.01 | 0.62 |
| <i>MNE × Tenure (avg)</i>                    | 0.99 | 0.00 | 0.00 | 1.00 | 0.00 | 0.29 | 1.00 | 0.00 | 0.51 |
| <i>MNE × lnWage (avg)</i>                    | 1.25 | 0.02 | 0.00 | 1.30 | 0.03 | 0.00 | 1.17 | 0.03 | 0.00 |
| <i>MNE × Prior moves</i>                     | 0.93 | 0.01 | 0.00 | 0.98 | 0.01 | 0.18 | 0.93 | 0.01 | 0.00 |
| <b>Level variables: Firm</b>                 |      |      |      |      |      |      |      |      |      |
| <i>Exporter</i>                              | 0.95 | 0.01 | 0.00 | 0.93 | 0.02 | 0.00 | 0.99 | 0.02 | 0.50 |
| <i>Importer</i>                              | 0.92 | 0.02 | 0.00 | 0.89 | 0.04 | 0.01 | 0.95 | 0.03 | 0.04 |
| <i>lnFirmEmployees</i>                       | 1.09 | 0.01 | 0.00 | 1.01 | 0.02 | 0.42 | 1.14 | 0.02 | 0.00 |
| <i>lnGroupEmployees</i>                      | 0.97 | 0.00 | 0.00 | 0.97 | 0.01 | 0.00 | 0.97 | 0.01 | 0.00 |
| <i>lnValueadded</i>                          | 0.84 | 0.01 | 0.00 | 0.94 | 0.02 | 0.01 | 0.82 | 0.01 | 0.00 |
| <i>Share of R&amp;D managers</i>             | 2.88 | 1.75 | 0.08 | 1.42 | 1.03 | 0.63 | 3.04 | 2.46 | 0.17 |
| <i>Share of STEM</i>                         | 0.97 | 0.02 | 0.14 | 1.02 | 0.04 | 0.70 | 0.91 | 0.03 | 0.01 |
| <i>Share of PhD</i>                          | 0.48 | 0.09 | 0.00 | 0.37 | 0.07 | 0.00 | 0.45 | 0.11 | 0.00 |
| <i>lnSales</i>                               | 1.08 | 0.01 | 0.00 | 1.06 | 0.02 | 0.00 | 1.04 | 0.01 | 0.00 |
| <i>ExitFirm</i>                              | 7.05 | 0.08 | 0.00 | 5.47 | 0.14 | 0.00 | 8.70 | 0.18 | 0.00 |
| <i>lnRegionSize</i>                          | 1.08 | 0.00 | 0.00 | 1.10 | 0.01 | 0.00 | 1.06 | 0.00 | 0.00 |
| <b>Interactions: Firm</b>                    |      |      |      |      |      |      |      |      |      |
| <i>MNE × Exporter</i>                        | 1.13 | 0.01 | 0.00 | 1.20 | 0.02 | 0.00 | 1.13 | 0.02 | 0.00 |
| <i>MNE × Importer</i>                        | 0.97 | 0.00 | 0.00 | 0.98 | 0.01 | 0.01 | 0.98 | 0.01 | 0.00 |
| <i>MNE × lnFirmEmployees (avg)</i>           | 1.13 | 0.01 | 0.00 | 1.20 | 0.02 | 0.00 | 1.13 | 0.02 | 0.00 |
| <i>MNE × lnGroupEmployees (avg)</i>          | 0.97 | 0.00 | 0.00 | 0.98 | 0.01 | 0.01 | 0.98 | 0.01 | 0.00 |
| <i>MNE × lnValueadd (avg)</i>                | 1.01 | 0.01 | 0.45 | 0.95 | 0.02 | 0.03 | 1.00 | 0.02 | 0.88 |
| <i>MNE × Share of R&amp;D Managers (avg)</i> | 0.15 | 0.11 | 0.01 | 0.28 | 0.24 | 0.13 | 0.44 | 0.40 | 0.37 |
| <i>MNE × Share of STEM (avg)</i>             | 0.50 | 0.01 | 0.00 | 0.50 | 0.02 | 0.00 | 0.39 | 0.01 | 0.00 |
| <i>MNE × Share of PhD (avg)</i>              | 1.13 | 0.01 | 0.00 | 1.20 | 0.02 | 0.00 | 1.13 | 0.02 | 0.00 |
| <i>MNE × lnSales (avg)</i>                   | 0.97 | 0.00 | 0.00 | 0.98 | 0.01 | 0.01 | 0.98 | 0.01 | 0.00 |
| <i>MNE × Exit (avg)</i>                      | 1.01 | 0.01 | 0.45 | 0.95 | 0.02 | 0.03 | 1.00 | 0.02 | 0.88 |
| <i>MNE × lnRegionSize (avg)</i>              | 0.98 | 0.00 | 0.00 | 0.97 | 0.01 | 0.00 | 0.99 | 0.01 | 0.01 |

|                             |           |      |      |          |      |      |           |      |      |
|-----------------------------|-----------|------|------|----------|------|------|-----------|------|------|
| y2010                       | 1.03      | 0.01 | 0.00 | 1.07     | 0.01 | 0.00 | 1.11      | 0.01 | 0.00 |
| y2011                       | 0.91      | 0.01 | 0.00 | 0.98     | 0.01 | 0.10 | 0.95      | 0.01 | 0.00 |
| y2012                       | 0.87      | 0.01 | 0.00 | 0.89     | 0.01 | 0.00 | 0.87      | 0.01 | 0.00 |
| y2013                       | 0.93      | 0.01 | 0.00 | 0.95     | 0.01 | 0.00 | 0.95      | 0.01 | 0.00 |
| Constant                    | 0.43      | 0.07 | 0.00 | 0.19     | 0.07 | 0.00 | 0.71      | 0.24 | 0.31 |
| Observations                | 3,625,916 |      |      | 901,138  |      |      | 1,561,656 |      |      |
| McFadden's Pseudo R-squared | 0.09      |      |      | 0.07     |      |      | 0.09      |      |      |
| Log-likelihood              | -770,569  |      |      | -261,655 |      |      | -323,717  |      |      |
| Chi-squared                 | 153,668   |      |      | 34,862   |      |      | 65,594    |      |      |

---

*Note:* All regressions include 3-digit industry dummies, but not reported due to space.

**Table A.9.** Mobility to different types of firms (only STEM educated employees with tenure longer than 2 years)

| VARIABLES                       | (1)        |      |         | (2)        |      |         | (3)        |      |         |
|---------------------------------|------------|------|---------|------------|------|---------|------------|------|---------|
|                                 | Other MNEs |      |         | Incumbent  |      |         | Start-up   |      |         |
|                                 | Odds ratio | se   | p-value | Odds ratio | se   | p-value | Odds ratio | se   | p-value |
| <i>MNE</i>                      | 1.69       | 0.04 | 0.00    | 1.31       | 0.08 | 0.00    | 1.07       | 0.03 | 0.02    |
| <i>Gender</i>                   | 1.01       | 0.01 | 0.55    | 0.68       | 0.03 | 0.00    | 1.02       | 0.02 | 0.15    |
| <i>Age</i>                      | 0.96       | 0.00 | 0.00    | 0.99       | 0.00 | 0.00    | 0.97       | 0.00 | 0.00    |
| <i>Children</i>                 | 1.11       | 0.01 | 0.00    | 1.10       | 0.02 | 0.00    | 1.09       | 0.01 | 0.00    |
| <i>YearsEducation</i>           | 1.08       | 0.00 | 0.00    | 0.99       | 0.01 | 0.11    | 0.99       | 0.00 | 0.14    |
| <i>PhD</i>                      | 0.70       | 0.03 | 0.00    | 1.00       | 0.10 | 0.97    | 1.34       | 0.07 | 0.00    |
| <i>Tenure</i>                   | 0.93       | 0.00 | 0.00    | 0.95       | 0.00 | 0.00    | 0.94       | 0.00 | 0.00    |
| <i>lnWage</i>                   | 1.25       | 0.02 | 0.00    | 1.62       | 0.06 | 0.00    | 0.83       | 0.02 | 0.00    |
| <i>Manager</i>                  | 1.76       | 0.04 | 0.00    | 1.37       | 0.06 | 0.00    | 1.13       | 0.03 | 0.00    |
| <i>Professional</i>             | 1.87       | 0.04 | 0.00    | 1.31       | 0.06 | 0.00    | 1.27       | 0.03 | 0.00    |
| <i>Technician</i>               | 1.89       | 0.03 | 0.00    | 1.09       | 0.04 | 0.02    | 1.14       | 0.02 | 0.00    |
| <i>PriorMoves</i>               | 1.08       | 0.01 | 0.00    | 1.14       | 0.02 | 0.00    | 1.13       | 0.01 | 0.00    |
| <i>lnFirmEmployees</i>          | 1.28       | 0.02 | 0.00    | 1.23       | 0.03 | 0.00    | 1.25       | 0.02 | 0.00    |
| <i>lnGroupEmployees</i>         | 0.93       | 0.00 | 0.00    | 0.93       | 0.01 | 0.00    | 0.97       | 0.00 | 0.00    |
| <i>lnValueadded</i>             | 0.82       | 0.01 | 0.00    | 0.85       | 0.02 | 0.00    | 0.80       | 0.01 | 0.00    |
| <i>Share of R&amp;D Manager</i> | 1.53       | 0.77 | 0.40    | 6.00       | 6.52 | 0.10    | 0.35       | 0.25 | 0.15    |
| <i>Share of STEM</i>            | 1.03       | 0.04 | 0.43    | 0.71       | 0.06 | 0.00    | 0.78       | 0.03 | 0.00    |
| <i>Share of PhD</i>             | 0.39       | 0.07 | 0.00    | 0.93       | 0.36 | 0.86    | 0.83       | 0.18 | 0.40    |
| <i>Exporter</i>                 | 1.02       | 0.02 | 0.17    | 0.90       | 0.03 | 0.00    | 0.90       | 0.02 | 0.00    |
| <i>Importer</i>                 | 0.97       | 0.03 | 0.28    | 0.89       | 0.05 | 0.04    | 0.82       | 0.02 | 0.00    |
| <i>lnSales</i>                  | 0.98       | 0.01 | 0.04    | 0.93       | 0.02 | 0.00    | 0.97       | 0.01 | 0.01    |
| <i>Exit</i>                     | 5.00       | 0.09 | 0.00    | 8.52       | 0.25 | 0.00    | 4.59       | 0.09 | 0.00    |
| <i>lnRegionSize</i>             | 1.07       | 0.00 | 0.00    | 1.05       | 0.01 | 0.00    | 1.03       | 0.00 | 0.00    |
| <i>y2010</i>                    | 1.16       | 0.02 | 0.00    | 1.36       | 0.04 | 0.00    | 0.98       | 0.02 | 0.26    |
| <i>y2011</i>                    | 1.00       | 0.02 | 0.87    | 1.07       | 0.04 | 0.07    | 0.88       | 0.01 | 0.00    |
| <i>y2012</i>                    | 0.88       | 0.01 | 0.00    | 1.04       | 0.04 | 0.21    | 0.84       | 0.01 | 0.00    |
| <i>y2013</i>                    | 0.94       | 0.01 | 0.00    | 1.11       | 0.04 | 0.00    | 0.93       | 0.02 | 0.00    |
| 3-digit sector dummies          | YES        | YES  | YES     | YES        | YES  | YES     | YES        | YES  | YES     |
| Constant                        | 0.03       | 0.02 | 0.00    | 26.72      | 8.91 | 0.00    | 0.00       | 0.00 | 0.00    |
| Observations                    | 1,561,728  |      |         |            |      |         |            |      |         |
| McFadden's Pseudo R-squared     | 0.0874     |      |         |            |      |         |            |      |         |
| Log-likelihood                  | -408,362   |      |         |            |      |         |            |      |         |
| Chi-squared                     | 78,173     |      |         |            |      |         |            |      |         |

Note: All regressions include 3-digit industry dummies
